# Supplementary material for: Interlaboratory evaluation of a standardized inductively coupled plasma-mass spectrometry method for the determination of trace elements in air filter samples: preliminary results
Source: Royal Society of Chemistry journal article supplement (doi:10.1039/c0ay00377h), 2010-01-01
Supplement: c0ay00377h.pdf [file c0ay00377h.pdf]

**ICP-MS Interlaboratory Study – Laboratory-reported results****K. Ashley, M. J. Brisson & A. M. Howe****Target metals levels**

Values shown are µg/filter  
[Blanks consisted of MCE filters spiked with reagent]

| <b>Element</b> | <b>Media spikes</b> |
|----------------|---------------------|
| Aluminum       | 5.0                 |
| Antimony       | 0.5                 |
| Arsenic        | 5.0                 |
| Barium         | 5.0                 |
| Beryllium      | 0.5                 |
| Cadmium        | 0.5                 |
| Chromium       | 5.0                 |
| Cobalt         | 0.5                 |
| Copper         | 5.0                 |
| Iron           | 5.0                 |
| Lead           | 0.5                 |
| Magnesium      | 5.0                 |
| Manganese      | 0.5                 |
| Molybdenum     | 0.5                 |
| Nickel         | 0.5                 |
| Selenium       | 0.5                 |
| Silver         | 0.5                 |
| Tin            | 0.5                 |
| Uranium        | 0.5                 |
| Vanadium       | 0.5                 |
| Zinc           | 5.0                 |

**Notes on table entries:**

Blank filters consist of sampling media (mixed cellulose ester filters) + reagent spikes.

Results are **flagged** only if obviously >> factor of two or more off.

Informational values are those that are so denoted by the reporting laboratory.

Laboratory names are coded to ensure confidentiality.

ICP-MS elemental results are reported in µg/sample.

*Aluminum (Al)*

| Laboratory | Media blanks*                      | Spiked filters   |
|------------|------------------------------------|------------------|
| 1          | <0.788 (×4)                        | 4.80, 4.60, 4.83 |
| 2          | 7.72, 7.30, 7.37                   | 12.0, 12.5, 12.3 |
| 3          | (no results)                       | (no results)     |
| 4          | 61, 32, 32.5                       | 32.0, 47.0, 18.5 |
| 5          | 0.26, 0.20, 0.14                   | 4.25, 4.99, 5.01 |
| 6          | 2.20, 1.00, 0.51                   | 5.50, 4.85, 7.47 |
| 7          | -0.189, -0.244, 0.091              | 5.37, 5.35, 5.38 |
| 8          | 0.264, 0.060, 0.041                | 6.70, 5.17, 5.03 |
| 9          | 0.129, 0.101, 0.124                | 5.30, 5.41, 5.35 |
| 10         | 0.151, 0.150, 0.135                | 5.20, 5.04, 5.03 |
| 11         | 1.9, 1.3, 1.4                      | 6.3, 8.8, 5.9    |
| 12         | <1.85 (×3)                         | 5.1, 6.0, 4.7    |
| 13         | 0 (×3)                             | 4.78, 4.81, 4.46 |
| 14         | 0.300, 0.203, 0.068                | 4.68, 4.97, 4.78 |
| 15         | (no results)                       | (no results)     |
| 16         | <2.5 (×3)                          | 4.0, 3.9, 3.8    |
| 17         | 2.24, 1.60, 1.70                   | 6.80, 18.1, 8.73 |
| 18         | [0.306, 0.843, 0.129] <sup>†</sup> | 5.58, 5.44, 4.91 |
| 19         | 0 (×3)                             | 6.70, 6.30, 6.81 |
| 20         | 0.99, 0.31, 0.60                   | 7.21, 7.10, 5.89 |

\*Significant blank levels. <sup>†</sup>Informational values. Flagged results.

*Antimony (Sb)*

| Laboratory | Media blanks           | Spiked filters      |
|------------|------------------------|---------------------|
| 1          | <0.003 (×3)            | 0.418, 0.395, 0.413 |
| 2          | (0)                    | 0.468, 0.480, 0.487 |
| 3          | <0.25 (×3)             | 0.482, 0.488, 0.489 |
| 4          | <0.25 (×3)             | 0.5 (×3)            |
| 5          | 0.00, 0.00, 0.01       | 0.45, 0.48, 0.48    |
| 6          | 0.00 (×3)              | 0.46, 0.46, 0.47    |
| 7          | 0.054, 0.027, 0.015    | 0.51 (×3)           |
| 8          | 0.037, 0.030, 0.014    | 0.39, 0.43, 0.52    |
| 9          | 0.001, 0.002, 0.001    | 0.50, 0.51, 0.50    |
| 10         | 0.0061, 0.0059, 0.0010 | 0.485, 0.485, 0.497 |
| 11         | 0.15, 0.13, 0.13       | 0.73, 0.84, 0.77    |
| 12         | –* (×3)                | 0.41, 0.41, 0.38    |
| 13         | 0.43, 0.42, 0.42       | 0.79, 0.80, 0.79    |
| 14         | (no results)           | (no results)        |
| 15         | <0.50 (×3)             | <0.50 (×3)          |
| 16         | <0.05 (×3)             | 0.48, 0.51, 0.48    |
| 17         | 0 (×3)                 | 0.213, 0.340, 0.033 |
| 18         | -0.001, 0.007, 0.003   | 0.494, 0.496, 0.499 |
| 19         | – (×3)                 | 0.47, 0.54, 0.50    |
| 20         | – (×3)                 | 0.72, 0.65, 0.64    |

\*Results below detection limit

*Arsenic (As)*

| Laboratory | Media blanks        | Spiked filters   |
|------------|---------------------|------------------|
| 1          | <0.006 (×4)         | 4.23, 4.25, 3.98 |
| 2          | 0.114, 0.104, 0.099 | 4.80, 4.87, 4.95 |
| 3          | <0.25 (×3)          | 4.98, 4.86, 5.04 |
| 4          | <0.25, <0.25, 0.30  | 5.4, 5.3, 6.2    |
| 5          | 0.04, 0.03, 0.02    | 4.80, 4.46, 4.85 |
| 6          | (0) (×3)            | 4.73, 4.93, 4.85 |
| 7          | -0.20, -0.22, -0.20 | 4.74, 4.73, 4.70 |
| 8          | <0.2 (×3)           | 4.48, 4.58, 4.61 |
| 9          | 0.012, 0.000, 0.001 | 5.28, 5.64, 5.45 |
| 10         | –* (×3)             | 5.41, 4.43, 5.42 |
| 11         | (0) (×3)            | 5.4, 5.9, 5.3    |
| 12         | – (×3)              | 1.7, 1.7, 1.6    |
| 13         | 0.52, 0.58, 0.58    | 5.07, 5.02, 5.02 |
| 14         | <0.029 (×3)         | 4.86, 4.97, 5.07 |
| 15         | <0.50 (×3)          | 4.80, 4.78, 4.85 |
| 16         | <0.25 (×3)          | 4.8, 4.8, 4.7    |
| 17         | 0.382, 0.055, 0.069 | 4.81, 5.29, 4.83 |
| 18         | 0.021, 0.011, 0.007 | 5.58, 5.30, 5.26 |
| 19         | – (×3)              | 4.13, 4.06, 4.56 |
| 20         | – (×3)              | 5.73, 5.64, 5.20 |

\*Results below detection limit. Flagged results.

**Barium (Ba)**

| <b>Laboratory</b> | <b>Media blanks</b>    | <b>Spiked filters</b> |
|-------------------|------------------------|-----------------------|
| 1                 | <0.004 (×4)            | 4.43, 4.20, 4.43      |
| 2                 | (0) (×3)               | 4.89, 5.13, 5.04      |
| 3                 | <0.25 (×3)             | 5.22, 5.22, 5.05      |
| 4                 | <1 (×3)                | 4.8, 4.9, 4.8         |
| 5                 | 0.01 (×3)              | 4.73, 4.89, 4.91      |
| 6                 | 0.01 (×3)              | 4.76, 4.85, 4.86      |
| 7                 | 0.0047, 0.0074, 0.0129 | 4.68, 4.64, 4.67      |
| 8                 | <0.03 (×3)             | 4.55, 4.52, 4.63      |
| 9                 | 0.016, 0.009, 0.011    | 4.88, 5.03, 4.99      |
| 10                | 0.0234, 0.0581, 0.0634 | 4.92, 4.89, 4.86      |
| 11                | 0.029, 0.033, 0.029    | 5.4, 5.8, 5.5         |
| 12                | –* (×3)                | 4.2, 4.2, 3.9         |
| 13                | 0.58, 0.58, 0.57       | 4.89, 4.90, 4.93      |
| 14                | <0.034 (×3)            | 4.77, 4.95, 5.06      |
| 15                | (no results)           | (no results)          |
| 16                | <0.25 (×3)             | 4.8 (×3)              |
| 17                | 0.089, 0.062, 0.048    | 5.19, 5.21, 5.19      |
| 18                | 0.056, 0.055, 0.063    | 5.18, 5.03, 5.15      |
| 19                | 0.04, 0.07, 0.08       | 3.85, 4.46, 4.44      |
| 20                | – (×3)                 | 5.61, 5.41, 5.18      |

\*Results below detection limit. **Flagged results.**

***Beryllium (Be)***

| <b>Laboratory</b> | <b>Media blanks</b>       | <b>Spiked filters</b> |
|-------------------|---------------------------|-----------------------|
| 1                 | <0.008 (×4)               | 0.440, 0.415, 0.495   |
| 2                 | (0) (×3)                  | 0.494, 0.496, 0.516   |
| 3                 | <0.05 (×3)                | 0.481, 0.481, 0.470   |
| 4                 | <1 (×3)                   | <1 (×3)               |
| 5                 | (0) (×3)                  | 0.44, 0.46, 0.46      |
| 6                 | (0) (×3)                  | 0.43, 0.45, 0.44      |
| 7                 | 0.0156, 0.0243, 0.0214    | 0.536, 0.535, 0.544   |
| 8                 | <0.04 (×3)                | 0.464, 0.473, 0.450   |
| 9                 | (0) (×3)                  | 0.480, 0.496, 0.484   |
| 10                | 0.00036, 0.00032, 0.00016 | 0.496, 0.501, 0.503   |
| 11                | 0.027, 0.028, 0.031       | 0.60, 0.65, 0.59      |
| 12                | <0.006 (×3)               | 0.47, 0.48, 0.48      |
| 13                | 0.074, 0.070, 0.071       | 0.558, 0.538, 0.563   |
| 14                | <0.010 (×3)               | 0.476, 0.483, 0.490   |
| 15                | <0.50 (×3)                | 0.57, 0.58, 0.56      |
| 16                | <0.25 (×3)                | 0.46, 0.44, 0.46      |
| 17                | (0) (×3)                  | 0.478, 0.494, 0.493   |
| 18                | 0.000, -0.001, 0.002      | 0.544, 0.502, 0.505   |
| 19                | (0) (×3)                  | 0.61, 0.57, 0.59      |
| 20                | 0.48, 0.05, 0.04          | 0.62, 0.62, 0.59      |

Flagged results.

*Cadmium (Cd)*

| Laboratory | Media blanks           | Spiked filters      |
|------------|------------------------|---------------------|
| 1          | <0.002 (×4)            | 0.433, 0.413, 0.433 |
| 2          | (0) (×3)               | 0.485, 0.494, 0.501 |
| 3          | <0.13 (×3)             | 0.538, 0.533, 0.526 |
| 4          | <0.1 (×3)              | 0.5 (×3)            |
| 5          | 0.001 (×3)             | 0.46, 0.49, 0.49    |
| 6          | (0) (×3)               | 0.49, 0.50, 0.49    |
| 7          | 0.0059, 0.0061, 0.0015 | 0.497, 0.517, 0.519 |
| 8          | <0.01 (×3)             | 0.500, 0.501, 0.503 |
| 9          | (0) (×3)               | 0.487, 0.503, 0.497 |
| 10         | (no result)            | 0.500, 0.501, 0.503 |
| 11         | (0) (×3)               | 0.54, 0.61, 0.54    |
| 12         | <0.0035 (×3)           | 0.49, 0.45, 0.49    |
| 13         | 0.786, 0.782, 0.781    | 1.24, 1.26, 1.26    |
| 14         | <0.019 (×3)            | 0.505, 0.482, 0.502 |
| 15         | <0.50 (×3)             | <0.50 (×3)          |
| 16         | <0.05 (×3)             | 0.51, 0.52, 0.51    |
| 17         | (0) (×3)               | 0.460, 0.472, 0.447 |
| 18         | 0.010, 0.001, 0.001    | 0.517, 0.514, 0.520 |
| 19         | –* (×3)                | 0.50, 0.53, 0.54    |
| 20         | 0.05 (×3)              | 0.62, 0.58, 0.60    |

\*Results below detection limit. **Flagged results.**

**Chromium (Cr)**

| Laboratory | Media blanks*                     | Spiked filters   |
|------------|-----------------------------------|------------------|
| 1          | 0.285, 0.205, 0.198, 0.197        | 4.90, 4.65, 4.93 |
| 2          | 0.191, 0.188, 0.153               | 4.83, 5.00, 5.08 |
| 3          | <0.5 (×3)                         | 4.87, 4.93, 4.76 |
| 4          | 0.1, 0.2, 0.2                     | 5.1, 5.3, 5.1    |
| 5          | 0.17, 0.17, 0.16                  | 4.77, 4.95, 4.97 |
| 6          | 0.16, 0.16, 0.19                  | 4.94, 4.93, 4.97 |
| 7          | 0.230, 0.241, 0.233               | 5.41, 5.39, 5.34 |
| 8          | <0.06 (×3)                        | 4.28, 4.54, 4.54 |
| 9          | 0.180, 0.223, 0.194               | 4.79, 4.83, 4.77 |
| 10         | 0.140, 0.142, 0.137               | 5.03, 5.00, 5.05 |
| 11         | 1.1, 1.4, 1.2                     | 6.7, 7.7, 6.7    |
| 12         | 0.19, 0.21, 0.19                  | 4.6, 4.9, 5.0    |
| 13         | (0) (×3)                          | 4.35, 4.43, 4.39 |
| 14         | 0.169, 0.163, 0.153               | 5.21, 5.17, 5.00 |
| 15         | <0.5 (×3)                         | 5.01, 5.04, 5.03 |
| 16         | <0.5 (×3)                         | 5.1, 4.9, 5.1    |
| 17         | 0.078, 0.086, 0.493               | 5.38, 5.44, 5.55 |
| 18         | [0.461, 0.191, 1.60] <sup>†</sup> | 5.18, 5.50, 5.28 |
| 19         | 0.12, 0.04, 0.03                  | 3.70, 3.36, 4.30 |
| 20         | <0.1 (×2), 0.20                   | 6.38, 6.07, 5.62 |

\* Apparent significant blank levels. **Flagged results.** <sup>†</sup> Informational values.



**Cobalt (Co)**

| Laboratory | Media blanks              | Spiked filters      |
|------------|---------------------------|---------------------|
| 1          | <0.001 (×4)               | 0.478, 0.450, 0.480 |
| 2          | (0) (×3)                  | 0.520, 0.516, 0.515 |
| 3          | <0.025 (×3)               | 0.493, 0.498, 0.486 |
| 4          | <0.05 (×3)                | 0.5 (×3)            |
| 5          | (0) (×3)                  | 0.50, 0.48, 0.49    |
| 6          | (0) (×3)                  | 0.48, 0.48, 0.47    |
| 7          | 0.0158, 0.0123, 0.0089    | 0.517, 0.524, 0.509 |
| 8          | <0.008 (×3)               | 0.462, 0.457, 0.464 |
| 9          | (0) (×3)                  | 0.496, 0.503, 0.510 |
| 10         | 0.00045, 0.00049, 0.00049 | 0.492, 0.490, 0.500 |
| 11         | (0) (×3)                  | 0.60, 0.67, 0.59    |
| 12         | <0.0022 (×3)              | 0.46, 0.47, 0.44    |
| 13         | 0.008, 0.003, 0.002       | 0.493, 0.493, 0.565 |
| 14         | <0.005 (×3)               | 0.524, 0.509, 0.527 |
| 15         | <0.50 (×3)                | <0.50 (×3)          |
| 16         | <0.05 (×3)                | 0.47, 0.47, 0.45    |
| 17         | (0) (×3)                  | 0.441, 0.458, 0.447 |
| 18         | 0.001, 0.000, 0.003       | 0.504, 0.509, 0.521 |
| 19         | –* (×3)                   | 0.40, 0.41, 0.44    |
| 20         | –, 0.17, 0.51             | 0.66, 0.62, 0.59    |

\*Results below detection limit. **Flagged results**

***Copper (Cu)***

| <b>Laboratory</b> | <b>Media blanks</b> | <b>Spiked filters</b> |
|-------------------|---------------------|-----------------------|
| 1                 | <0.028 (×3)         | 4.80, 4.53, 4.85      |
| 2                 | (0) (×3)            | 5.20, 5.42, 5.36      |
| 3                 | <0.025 (×3)         | 4.92, 5.01, 5.02      |
| 4                 | <0.1 (×3)           | 5.0, 5.0, 4.9         |
| 5                 | 0.05, 0.04, 0.01    | 4.77, 5.04, 5.03      |
| 6                 | 0.04, 0.04, 0.05    | 4.90, 4.92, 5.07      |
| 7                 | 0.039, 0.054, 0.020 | 5.39, 5.34, 5.34      |
| 8                 | <0.004 (×3)         | 4.68 (×3)             |
| 9                 | 0.035, 0.033, 0.045 | 4.91, 4.99, 5.06      |
| 10                | 0.061, 0.082, 0.096 | 5.06, 5.05, 5.05      |
| 11                | 0.29, 0.31, 0.42    | 6.1, 6.6, 5.9         |
| 12                | <0.050 (×3)         | 4.2, 4.5, 4.6         |
| 13                | 0 (×3)              | 4.76, 4.72, 4.72      |
| 14                | 0.046, 0.130, 0.028 | 4.93, 5.09, 5.10      |
| 15                | <0.50 (×3)          | 4.77, 4.78, 4.74      |
| 16                | <0.05 (×3)          | 4.9, 4.8, 4.9         |
| 17                | 0, 0.055, 0.022     | 5.36, 5.20, 5.26      |
| 18                | 0.019, 0.009, 0.009 | 5.03, 5.01, 5.10      |
| 19                | –* (×3)             | 7.32, 6.76, 3.44      |
| 20                | 1.69, 0.14, 0.71    | 7.64, 6.91, 6.97      |

\*Results below detection limit. **Flagged results**

**Iron (Fe)**

| Laboratory | Media blanks*       | Spiked filters   |
|------------|---------------------|------------------|
| 1          | <0.468 (×4)         | 6.70, 6.23, 6.65 |
| 2          | 0.637, 1.66, 0.807  | 5.41, 5.74, 5.66 |
| 3          | (no results)        | (no results)     |
| 4          | <25 (×3)            | <25 (×3)         |
| 5          | 0.40, 0.46, 0.51    | 5.14, 5.45, 5.34 |
| 6          | 0.41, 0.47, 0.39    | 5.11, 4.98, 5.07 |
| 7          | 2.49, 2.29, 2.73    | 8.34, 8.55, 8.60 |
| 8          | <0.6 (×3)           | 5.45, 4.40, 4.32 |
| 9          | 0.453, 0.268, 0.272 | 5.82, 6.05, 5.85 |
| 10         | 0.255, 0.280, 0.342 | 5.15, 5.20, 5.32 |
| 11         | 1.1, 0.79, 0.63     | 5.9, 5.8, 11     |
| 12         | <0.825 (×3)         | 4.1, 5.1, 3.9    |
| 13         | 0.65, 0.45, 0.40    | 6.15, 5.60, 5.20 |
| 14         | <2.76 (×3)          | 4.75, 5.08, 5.56 |
| 15         | (no results)        | (no results)     |
| 16         | (no results)        | (no results)     |
| 17         | 0, 1.87, 0.159      | 5.27, 5.75, 6.26 |
| 18         | [3.71, 3.43, 2.12]† | 8.63, 8.92, 6.76 |
| 19         | –# (×3)             | 5.4, 4.2, 5.1    |
| 20         | 1.98, 1.84, 3.09    | 7.92, 7.93, 7.43 |

\*Significant blanks. #Results below detection limit. **Flagged results.** †Informational values

**Lead (Pb)**

| <b>Laboratory</b> | <b>Media blanks</b>       | <b>Spiked filters</b> |
|-------------------|---------------------------|-----------------------|
| 1                 | <0.004 (×4)               | 0.455, 0.433, 0.460   |
| 2                 | (0) (×3)                  | 0.501, 0.516, 0.513   |
| 3                 | <0.13 (×3)                | 0.485, 0.487, 0.480   |
| 4                 | <0.25 (×3)                | 0.5 (×3)              |
| 5                 | 0.00, 0.01, 0.01          | 0.48, 0.49, 0.49      |
| 6                 | 0.013, 0.011, 0.007       | 0.52, 0.51, 0.51      |
| 7                 | 0.0081, 0.0062, 0.0042    | 0.525, 0.508, 0.512   |
| 8                 | <0.02 (×3)                | 0.546, 0.537, 0.524   |
| 9                 | 0.006, 0.006, 0.005       | 0.526, 0.539, 0.531   |
| 10                | 0.0023, 0.0023, 0.0022    | 0.501, 0.499, 0.496   |
| 11                | (0) (×3)                  | 0.56, 0.67, 0.58      |
| 12                | <0.075 (×3)               | 0.77, 0.70, 0.63      |
| 13                | 0.058, 0.052 (×2)         | 0.510, 0.504, 0.512   |
| 14                | <0.010 (×3)               | 0.502, 0.520, 0.521   |
| 15                | <0.50 (×3)                | <0.50 (×3)            |
| 16                | <0.25 (×3)                | 0.49 (×3)             |
| 17                | (0) (×3)                  | 0.500, 0.512, 0.513   |
| 18                | (no results)              | (no results)          |
| 19                | (0) (×3)                  | 0.45, 0.43, 0.59      |
| 20                | – <sup>#</sup> (×2), 0.27 | 0.48, 0.49, 0.43      |

Flagged results. <sup>#</sup>Results below detection limit.

*Magnesium (Mg)*

| Laboratory | Media blanks*                     | Spiked filters   |
|------------|-----------------------------------|------------------|
| 1          | <0.548 (×4)                       | 4.80, 4.55, 4.68 |
| 2          | 0.774, 0.735, 0.712               | 5.64, 5.89, 5.93 |
| 3          | (no results)                      | (no results)     |
| 4          | <0.25 (×3)                        | 0.515 (×3)       |
| 5          | 1.12, 0.50, 0.51                  | 6.36, 5.80, 5.78 |
| 6          | 0.75, 0.45 (×2)                   | 4.64, 4.80, 4.83 |
| 7          | 0.597, 0.596, 0.538               | 6.51, 6.38, 6.38 |
| 8          | 0.43, 0.36, 0.46                  | 7.38, 5.22, 5.14 |
| 9          | 0.378, 0.408, 0.461               | 5.15, 5.20, 5.15 |
| 10         | 0.461, 0.467, 0.458               | 5.39, 5.34, 5.34 |
| 11         | 1.1, 1.0, 0.86                    | 5.4, 6.6, 6.5    |
| 12         | 0.52, 0.50, 0.56                  | 5.2, 5.2, 5.0    |
| 13         | 0.50, 0.55 (×2)                   | 5.10, 5.50, 5.20 |
| 14         | 0.414, 0.522, 0.422               | 5.2, 5.6, 5.4    |
| 15         | (no results)                      | (no results)     |
| 16         | (no results)                      | (no results)     |
| 17         | 1.01, 1.23, 1.47                  | 5.71, 6.56, 6.62 |
| 18         | [0.621, 1.22, 0.828] <sup>†</sup> | 6.88, 6.56, 6.29 |
| 19         | – <sup>#</sup> (×3)               | 4.30, 3.34, 3.28 |
| 20         | 1.28, 0.69, 0.84                  | 7.41, 6.96, 7.67 |

\*Significant blank levels. **Flagged result.** <sup>#</sup>Results below detection limit. <sup>†</sup>Informational values.

**Manganese (Mn)**

| <b>Laboratory</b> | <b>Media blanks</b>                | <b>Spiked filters</b> |
|-------------------|------------------------------------|-----------------------|
| 1                 | <0.009 (×4)                        | 0.490, 0.463, 0.490   |
| 2                 | (0) (×3)                           | 0.506, 0.520, 0.489   |
| 3                 | <0.13 (×3)                         | 0.478, 0.481, 0.489   |
| 4                 | <0.05 (×3)                         | 0.5 (×3)              |
| 5                 | 0.01 (×3)                          | 0.49, 0.48 (×2)       |
| 6                 | 0.022, 0.011, 0.010                | 0.49, 0.48, 0.50      |
| 7                 | 0.0474, 0.0461, 0.0458             | 0.548, 0.543, 0.554   |
| 8                 | <0.02 (×3)                         | 0.454, 0.450, 0.441   |
| 9                 | 0.014, 0.010, 0.009                | 0.526, 0.533, 0.515   |
| 10                | 0.0093, 0.0084, 0.0096             | 0.496, 0.492, 0.493   |
| 11                | 0.019, 0.029, 0.092                | 0.63, 0.62, 0.73      |
| 12                | <0.025 (×3)                        | 0.42, 0.40, 0.41      |
| 13                | (0) (×3)                           | 0.45, 0.40 (×2)       |
| 14                | 0.006, 0.005, 0.001                | 0.497, 0.516 (×2)     |
| 15                | <0.50 (×3)                         | <0.50 (×3)            |
| 16                | <0.025 (×3)                        | 0.49, 0.48, 0.47      |
| 17                | 2.59, 2.46, 2.48                   | 3.06, 3.07, 3.08      |
| 18                | [0.036, 0.042, 0.031] <sup>†</sup> | 0.528, 0.541, 0.526   |
| 19                | (0) (×3)                           | 0.51, 0.49, 0.47      |
| 20                | –*                                 | 0.64, 0.63, 0.59      |

Flagged results. <sup>†</sup>Informational values. \*Results below detection limit.

*Molybdenum (Mo)*

| Laboratory | Media blanks                        | Spiked filters      |
|------------|-------------------------------------|---------------------|
| 1          | <0.002 (×4)                         | 0.458, 0.440, 0.470 |
| 2          | (0) (×3)                            | 0.496, 0.508, 0.513 |
| 3          | <0.13 (×3)                          | 0.542, 0.544, 0.530 |
| 4          | <1 (×3)                             | <1 (×3)             |
| 5          | -0.01, 0.01 (×2)                    | 0.51, 0.52, 0.49    |
| 6          | 0.00, 0.001, 0.003                  | 0.51, 0.52, 0.50    |
| 7          | 0.0492, 0.0204, 0.0168              | 0.513, 0.509, 0.491 |
| 8          | 0.005, 0.004, 0.010                 | 0.504, 0.492, 0.478 |
| 9          | 0.002 (×3)                          | 0.514, 0.540, 0.502 |
| 10         | 0.0054, 0.0024, 0.0040              | 0.502, 0.496, 0.488 |
| 11         | 0.013, 0.025, 0.017                 | 0.68, 0.61 (×2)     |
| 12         | –* (×3)                             | 0.43, 0.53, 0.47    |
| 13         | (0) (×3)                            | 0.192, 0.200, 0.196 |
| 14         | <0.014 (×3)                         | 0.492, 0.507, 0.513 |
| 15         | <0.50 (×3)                          | <0.50 (×3)          |
| 16         | (no results)                        | (no results)        |
| 17         | 0.286, 0.134, 0.096                 | 0.700, 0.773, 0.704 |
| 18         | [0.267, 1.461, -0.013] <sup>†</sup> | 0.491, 0.490, 0.548 |
| 19         | (0) (×3)                            | 0.51, 0.49, 0.47    |
| 20         | 0.11, 0.15, 0.05                    | 0.64, 0.60, 0.65    |

\*Results below detection limit. **Flagged results.** <sup>†</sup>Informational values.

*Nickel (Ni)*

| Laboratory | Media blanks                       | Spiked filters      |
|------------|------------------------------------|---------------------|
| 1          | 0.015 (×2), 0.020, 0.021           | 0.495, 0.465, 0.500 |
| 2          | (0) (×3)                           | 0.517, 0.534, 0.530 |
| 3          | <0.25 (×3)                         | 0.464, 0.461, 0.475 |
| 4          | <0.1 (×3)                          | 0.5 (×3)            |
| 5          | 0.02 (×3)                          | 0.49, 0.51 (×2)     |
| 6          | 0.112, 0.028, 0.050                | 0.51, 0.52, 0.50    |
| 7          | 0.0233, 0.069, 0.059               | 0.545, 0.543, 0.528 |
| 8          | <0.02, 0.048, 0.195                | 0.508, 0.495, 0.519 |
| 9          | 0.039, 0.021, 0.020                | 0.506, 0.522, 0.509 |
| 10         | 0.0266, 0.0186, 0.0196             | 0.510, 0.517, 0.508 |
| 11         | 0.069, 0.052, 0.055                | 0.62, 0.61, 0.84    |
| 12         | <0.100 (×3)                        | 0.47, 0.43, 0.53    |
| 13         | (0) (×3)                           | (0) (×3)            |
| 14         | [0.036, 0.028, 0.026] <sup>†</sup> | 0.502, 0.516, 0.518 |
| 15         | <0.50 (×3)                         | <0.50 (×3)          |
| 16         | <0.25 (×3)                         | 0.53, 0.52, 0.49    |
| 17         | 0.102, 0.242, 0.053                | 0.523, 0.545, 0.593 |
| 18         | [1.28, 6.58, 0.034] <sup>†</sup>   | 0.577, 0.551, 0.866 |
| 19         | (0) (×3)                           | 0.44, 0.53, 0.41    |
| 20         | - <sup>#</sup> (×2), 0.28          | 0.39, 0.32, 0.35    |

Flagged results. <sup>†</sup>Informational values. <sup>#</sup>Results below detection limit.



*Selenium (Se)*

| Laboratory | Media blanks         | Spiked filters      |
|------------|----------------------|---------------------|
| 1          | <0.115 (×4)          | 0.380, 0.373, 0.398 |
| 2          | (0) (×3)             | 0.429, 0.434, 0.437 |
| 3          | <0.25 (×3)           | 0.398, 0.414, 0.314 |
| 4          | <0.25 (×3)           | 0.5 (×3)            |
| 5          | 0.01, 0.00 (×2)      | 0.42, 0.47, 0.44    |
| 6          | 0.003, 0.016, 0.000  | 0.45, 0.47 (×2)     |
| 7          | 0.037, 0.090, -0.001 | 0.443, 0.589, 0.468 |
| 8          | <0.4 (×3)            | 0.58, 0.46 (×2)     |
| 9          | (0) (×3)             | 0.498, 0.522, 0.469 |
| 10         | –*                   | 0.536, 0.528, 0.517 |
| 11         | 0.033, 0.11, 0.12    | 0.54 (×2), 0.62     |
| 12         | <0.100 (×3)          | 0.61, 0.53, 0.63    |
| 13         | 0.086, 0.098, 0.041  | 0.489, 0.604, 0.443 |
| 14         | <0.042 (×3)          | 0.360, 0.361, 0.373 |
| 15         | <0.50 (×3)           | <0.50 (×3)          |
| 16         | <0.25 (×3)           | 0.48, 0.47, 0.45    |
| 17         | 0.365, 0, 0          | 0.395, 0.397, 1.37  |
| 18         | – (×3)               | 0.550, 0.451, 0.206 |
| 19         | – (×3)               | 0.70, 0.41, 0.55    |
| 20         | 0.05, 0.05, 0.07     | 0.57, 0.57, 0.55    |

\*Results below detection limit. **Flagged results.**

*Silver (Ag)*

| Laboratory | Media blanks                         | Spiked filters                      |
|------------|--------------------------------------|-------------------------------------|
| 1          | <0.006 (×4)                          | 0.453, 0.433, 0.453                 |
| 2          | (0)                                  | 0.496, 0.512, 0.507                 |
| 3          | <0.05 (×3)                           | 0.529, 0.519, 0.520                 |
| 4          | <10 (×3)                             | <10 (×3)                            |
| 5          | (0) (×3)                             | 0.49, 0.51, 0.48                    |
| 6          | 0.001 (×2), 0.002                    | 0.5 (×3)                            |
| 7          | –* (×3)                              | 0.294, 0.341, 0.358                 |
| 8          | <0.009 (×3)                          | 0.531, 0.516, 0.507                 |
| 9          | 0.001, 0.00 (×2)                     | 0.594, 0.605, 0.561                 |
| 10         | – (×3)                               | 0.488, 0.482 (×2)                   |
| 11         | (0) (×3)                             | 0.67, 0.61 (×2)                     |
| 12         | – (×3)                               | 0.50, 0.46, 0.49                    |
| 13         | 0.15, 0.10 (×2)                      | 0.60, 0.65, 0.65                    |
| 14         | <0.186 (×3)                          | 0.244, [0.035, 0.143] <sup>†</sup>  |
| 15         | (no results)                         | (no results)                        |
| 16         | 5.3, 7.9, 5.8                        | 7.6, 10.5, 0.5                      |
| 17         | (0) (×3)                             | (0) (×3)                            |
| 18         | [-0.003, -0.007, 0.006] <sup>†</sup> | [0.455, 0.944, -0.001] <sup>†</sup> |
| 19         | – (×3)                               | 0.47, 0.48, 0.78                    |
| 20         | – (×3)                               | 0.62, 0.61, 0.58                    |

\*Results below detection limit. **Flagged results.** <sup>†</sup>Informational values.

***Tin (Sn)***

| <b>Laboratory</b> | <b>Media blanks</b> | <b>Spiked filters</b> |
|-------------------|---------------------|-----------------------|
| 1                 | <0.187 (×4)         | 0.473, 0.465, 0.475   |
| 2                 | (0)                 | 0.512, 0.547, 0.554   |
| 3                 | <0.13 (×3)          | 0.514, 0.518, 0.510   |
| 4                 | <0.25 (×3)          | 0.5 (×3)              |
| 5                 | (no results)        | (no results)          |
| 6                 | 0.002, 0.000, 0.001 | 0.51, 0.50, 0.51      |
| 7                 | 0.034, 0.016, 0.009 | 0.582, 0.580, 0.566   |
| 8                 | <0.008 (×3)         | 0.484, 0.469, 0.486   |
| 9                 | 0.007, 0.005 (×2)   | 0.477, 0.499, 0.493   |
| 10                | 0.0013 (×3)         | 0.485, 0.478, 0.479   |
| 11                | 0.31, 0.41, 0.39    | 0.92, 0.96, 0.93      |
| 12                | –* (×3)             | 0.43, 0.42, 0.47      |
| 13                | 0.307, 0.301, 0.300 | 0.745, 0.756, 0.765   |
| 14                | <0.011 (×3)         | 0.509, 0.523, 0.521   |
| 15                | <0.50 (×3)          | <0.50 (×3)            |
| 16                | (no results)        | (no results)          |
| 17                | (0) (×3)            | 0.664, 0.68, 0.512    |
| 18                | -0.011 (×3)         | 0.384, 0.352, 0.351   |
| 19                | – (×3)              | 0.78, 0.53, 0.73      |
| 20                | – (×3)              | 0.72, 0.65, 0.64      |

\*Result below detection limit. **Flagged results.**

*Uranium (U)*

| Laboratory | Media blanks           | Spiked filters      |
|------------|------------------------|---------------------|
| 1          | <0.038 (×4)            | 0.475, 0.453, 0.483 |
| 2          | (0) (×3)               | 0.507, 0.511, 0.505 |
| 3          | <0.025 (×3)            | 0.501, 0.492, 0.497 |
| 4          | (no results)           | (no results)        |
| 5          | (no results)           | (no results)        |
| 6          | (no results)           | (no results)        |
| 7          | 0.0132, 0.0079, 0.0062 | 0.489, 0.483, 0.480 |
| 8          | <0.0008 (×3)           | 0.521, 0.520, 0.507 |
| 9          | (0) (×3)               | 0.515, 0.533, 0.529 |
| 10         | –* (×3)                | 0.487, 0.481, 0.482 |
| 11         | (0) (×3)               | 0.45, 0.47, 0.47    |
| 12         | – (×3)                 | 0.45, 0.48, 0.47    |
| 13         | 0.243, 0.239 (×2)      | 0.694, 0.692, 0.687 |
| 14         | <0.008 (×3)            | 0.461, 0.454, 0.473 |
| 15         | (no results)           | (no results)        |
| 16         | <0.05 (×3)             | 0.50, 0.49, 0.49    |
| 17         | (no results)           | (no results)        |
| 18         | -0.001 (×3)            | 0.454, 0.462 (×2)   |
| 19         | (0) (×3)               | 0.50, 0.30, 1.08    |
| 20         | – (×3)                 | 5.5, 5.5, 5.4       |

\*Result below detection limit. **Flagged results.**

*Vanadium (V)*

| Laboratory | Media blanks                     | Spiked filters                  |
|------------|----------------------------------|---------------------------------|
| 1          | (no results)                     | (no results)                    |
| 2          | 0.0374, 0.0316, 0.0293           | 0.435, 0.456, 0.453             |
| 3          | <1.3 (×3)                        | <1.3 (×3)                       |
| 4          | <0.05 (×3)                       | <0.05 (×3)                      |
| 5          | (0) (×3)                         | 0.46, 0.48 (×2)                 |
| 6          | (0) (×3)                         | 0.47, 0.48 (×2)                 |
| 7          | 0.0015, 0.0097, 0.0031           | 0.510, 0.474, 0.457             |
| 8          | 1.06, 0.65, 1.22                 | 1.08, 1.09, 1.55                |
| 9          | 0.013, 0.013, 0.013              | 0.289, 0.343, 0.272             |
| 10         | –* (×3)                          | 0.513, 0.512, 0.511             |
| 11         | (0) (×3)                         | (0) (×3)                        |
| 12         | 0.0085, 0.0065, 0.0075           | 0.48, 0.49, 0.46                |
| 13         | (0) (×3)                         | 0.300, 0.321, 0.375             |
| 14         | <0.005 (×3)                      | 0.500, 0.489, 0.508             |
| 15         | <0.50 (×3)                       | <0.50 (×3)                      |
| 16         | <0.05 (×3)                       | 0.48, 0.47, 0.48                |
| 17         | (0) (×3)                         | 0, 0.116, 0.379                 |
| 18         | [9.39, 8.66, 0.291] <sup>†</sup> | [12.5, 14.2, 2.86] <sup>†</sup> |
| 19         | – (×3)                           | 0.69, 0.46, 0.48                |
| 20         | – (×3)                           | 0.70, 0.64, 0.54                |

\*Results below detection limit. **Flagged results.** <sup>†</sup>Informational values.

**Zinc (Zn)**

| Laboratory | Media blanks*                      | Spiked filters   |
|------------|------------------------------------|------------------|
| 1          | 0.440, 0.462, 0.430, 0.533         | 4.88 (×2), 4.55  |
| 2          | 0.602, 0.581, 1.85                 | 5.35, 5.43, 5.68 |
| 3          | 5.08, 0.546, 1.85                  | 5.52, 5.51, 5.46 |
| 4          | <0.25 (×3)                         | 5.2, 5.1, 4.8    |
| 5          | 1.44, 0.49, 0.50                   | 5.15, 5.17, 5.32 |
| 6          | 2.79, 0.83, 0.87                   | 5.89, 5.84, 5.82 |
| 7          | 0.515, 0.590, 0.527                | 5.72, 5.70, 5.61 |
| 8          | 0.54, 0.47, 0.46                   | 5.14, 5.06, 5.12 |
| 9          | 0.698, 0.504, 0.527                | 5.71, 5.86, 5.68 |
| 10         | 0.697, 0.699, 0.693                | 5.96, 6.10, 5.97 |
| 11         | 0.58, 0.46, 0.54                   | 6.3, 6.9, 6.1    |
| 12         | 0.59, 0.62, 1.4                    | 5.4, 5.5, 5.0    |
| 13         | 1.11, 0.98, 0.96                   | 5.54, 5.59, 5.77 |
| 14         | 1.05, 1.01, 0.900                  | 6.57, 8.52, 6.49 |
| 15         | <0.50 (×3)                         | 4.81, 4.86, 4.97 |
| 16         | 1.3, 1.0, 0.5                      | 5.2, 5.2, 5.1    |
| 17         | 0.657, 0.537, 0.578                | 5.59, 5.78, 5.64 |
| 18         | [1.066, 1.063, 0.740] <sup>†</sup> | 5.91, 6.12, 5.43 |
| 19         | –* (×3)                            | 5.53, 5.69, 4.16 |
| 20         | 0.79, 0.69, 11.35                  | 6.39, 6.27, 6.01 |

\*Highly significant blank levels. **Flagged results.** <sup>†</sup>Informational values. \*Results below detection limit.
